# Supplementary material for: Perfluorinated Compounds in Greenhouse and Open Agricultural Producing Areas of Three Provinces of China: Levels, Sources and Risk Assessment
Source: PubMed Central journal article supplement (PMC5201365; doi:10.3390/ijerph13121224), 2016-12-10
Supplement: ijerph-13-01224-s001.pdf [file ijerph-13-01224-s001.pdf]

# Supplementary Materials: Perfluorinated Compounds in Greenhouse and Open Agricultural Producing Areas of Three Provinces of China: Levels, Sources and Risk Assessment

Yanwei Zhang, Dongfei Tan, Yue Geng, Lu Wang, Yi Peng, Zeying He, Yaping Xu and Xiaowei Liu

**Table S1.** The information of linking between soil, irrigation water and agricultural products.

| Site        | Soil                       | Water | Products          |
|-------------|----------------------------|-------|-------------------|
| LN Province |                            |       |                   |
| Site1       | Top (LN1) and Deep (LN2)   | W-1   | 1 chinese cabbage |
| Site2       | Top (LN3) and Deep (LN4)   | W-2   | 2 lettuce         |
| Site3       | Top (LN5) and Deep (LN6)   | W-3   | 3 baby cabbage    |
| Site4       | Top (LN7) and Deep (LN8)   | W-4   | 4 celery          |
| Site5       | Top (LN9) and Deep (LN10)  | W-5   | 5 celery          |
| Site6       | Top (LN11) and Deep (LN12) | W-6   | 6 tomato          |
| Site7       | Top (LN13) and Deep (LN14) | W-7   | 7 tomato          |
| Site8       | Top (LN15) and Deep (LN16) | W-8   | 8 tomato          |
| Site9       | Top (LN17) and Deep (LN18) | W-9   | 9 tomato          |
| Site10      | Top (LN19) and Deep (LN20) | W-10  | 10 tomato         |
| Site11      | Top (LN21) and Deep (LN22) | W-11  | 11 cucumber       |
| Site12      | Top (LN23) and Deep (LN24) | W-12  | 12 cucumber       |
| Site13      | Top (LN25) and Deep (LN26) | W-13  | 13 cucumber       |
| Site14      | Top (LN27) and Deep (LN28) | W-14  | 14 cucumber       |
| Site15      | Top (LN29) and Deep (LN30) | W-15  | 15 cucumber       |
| Site16      | Top (LN31) and Deep (LN32) | W-16  | 16 cabbage        |
| Site17      | Top (LN33) and Deep (LN34) | W-17  | 17 raddish        |
| Site18      | Top (LN35) and Deep (LN36) | W-18  | 18 raddish        |
| Site19      | Top (LN37) and Deep (LN38) | W-19  | 19 potato         |
| Site20      | Top (LN39) and Deep (LN40) | W-20  | 20 potato         |
| Site21      | Top (LN41) and Deep (LN42) | W-21  | 21 potato         |
| Site22      | Top (LN43) and Deep (LN44) | W-22  | 22 asparagus bean |
| Site23      | Top (LN45) and Deep (LN46) | W-23  | 23 kidney bean    |
| Site24      | Top (LN47) and Deep (LN48) | W-24  | 24 asparagus bean |
| Site25      | Top (LN49) and Deep (LN50) | W-25  | 25 asparagus bean |
| SC Province |                            |       |                   |
| Site1       | Top (LN1) and Deep (LN2)   |       |                   |
| Site2       | Top (LN3) and Deep (LN4)   |       |                   |
| Site3       | Top (LN5) and Deep (LN6)   |       |                   |
| Site4       | Top (LN7) and Deep (LN8)   |       |                   |
| Site5       | Top (LN9) and Deep (LN10)  |       |                   |
| Site6       | Top (LN11) and Deep (LN12) |       |                   |
| Site7       | Top (LN13) and Deep (LN14) |       |                   |
| Site8       | Top (LN15) and Deep (LN16) |       |                   |
| Site9       | Top (LN17) and Deep (LN18) |       |                   |
| Site10      | Top (LN19) and Deep (LN20) |       |                   |

Table S1. Cont.

| Site        | Soil       | Water | Products |
|-------------|------------|-------|----------|
| SD Province |            |       |          |
| Site1       | Top (SD1)  |       |          |
| Site2       | Top (SD2)  |       |          |
| Site3       | Top (SD3)  |       |          |
| Site4       | Top (SD4)  |       |          |
| Site5       | Top (SD5)  |       |          |
| Site6       | Top (SD6)  |       |          |
| Site7       | Top (SD7)  |       |          |
| Site8       | Top (SD8)  |       |          |
| Site9       | Top (SD9)  |       |          |
| Site10      | Top (SD10) |       |          |
| Site11      | Top (SD11) |       |          |
| Site12      | Top (SD12) |       |          |
| Site13      | Top (SD13) |       |          |
| Site14      | Top (SD14) |       |          |
| Site15      | Top (SD15) |       |          |
| Site16      | Top (SD16) |       |          |
| Site17      | Top (SD17) |       |          |
| Site18      | Top (SD18) |       |          |
| Site19      | Top (SD19) |       |          |
| Site20      | Top (SD20) |       |          |
| Site21      | Top (SD21) |       |          |
| Site22      | Top (SD22) |       |          |
| Site23      | Top (SD23) |       |          |
| Site24      | Top (SD24) |       |          |
| Site25      | Top (SD25) |       |          |
| Site26      | Top (SD26) |       |          |
| Site27      | Top (SD27) |       |          |

LN: Liaoning; SC: Sichuan; SD: Shandong.

### Instrumental Analysis

A mobile phase program based on 2 mM NH<sub>4</sub>OAc in methanol (B) and 2 mM NH<sub>4</sub>OAc in water (A) at a flow rate of 0.4 mL·min<sup>-1</sup> was applied, starting at 10% B and increasing linearly to 60% B at 1.5 min, increasing to 85% B at 6 min, and increasing to 100% B at 7.1 min, where it was held for 4 min before going back to the initial condition over 0.1 min. The column was equilibrated with 2% mobile phase B for 4 min between runs. MS (Mass Spectrum) condition: nebulizing Gas Flow: 3 L·min<sup>-1</sup>, Heating Gas Flow: 10 L·min<sup>-1</sup>, Interface Temperature 300 °C, DL Temperature 250 °C, Heat Block Temperature 400 °C, Drying gas flow: 10 L·min<sup>-1</sup>.

**Table S2.** Details for target PFSA and PFCAs analyzed by LC/MS/MS.

| Compound                             | Acronym | Ion Transition (m/z) | Q1 | CE | Q3 |
|--------------------------------------|---------|----------------------|----|----|----|
| Perfluorocarboxylic acids            |         | PFCAs                |    |    |    |
| Perfluorobutanoic acid               | PFBA    | 213.1/169.0          | 16 | 11 | 17 |
| Perfluoropentanoic acid              | PFPeA   | 263.1/219.0          | 18 | 8  | 24 |
| Perfluorohexanoic acid               | PFHxA   | 313.1/269, 119       | 22 | 9  | 29 |
| Perfluoroheptanoic acid              | PFHpA   | 363.1/319, 169       | 14 | 10 | 12 |
| Perfluorooctanoic acid               | PFOA    | 413.1/369, 169       | 16 | 11 | 26 |
| Perfluorononanoic acid               | PFNA    | 463.1/419, 219       | 18 | 11 | 30 |
| Perfluorodecanoic acid               | PFDA    | 513.1/469, 219       | 20 | 11 | 23 |
| Perfluoroundecanoic acid             | PFUnDA  | 563.1/519, 269       | 22 | 13 | 38 |
| Perfluorododecanoic acid             | PFDoDA  | 613.2/569.1, 169     | 24 | 13 | 28 |
| Perfluorotridecanoic acid            | PFTriDA | 663.2/619.1, 169     | 26 | 13 | 32 |
| Perfluorotetradecanoic acid          | PFTeDA  | 713.2/669.1, 169     | 20 | 13 | 34 |
| Perfluorohexadecanoic acid           | PFHxDA  | 813.2/769, 169       | 20 | 14 | 40 |
| Perfluorooctadecanoic acid           | PFODA   | 913.2/868.9, 169     | 22 | 16 | 32 |
| Perfluorosulfonic acids              |         | PFSAs                |    |    |    |
| Perfluoro-1-butanedisulfonate        | PFBS    | 299/80, 99           | 22 | 33 | 30 |
| Perfluoropentadisulfonate            | PFPeS   | 349/80, 99           | 27 | 41 | 30 |
| Perfluorohexadisulfonate             | PFHxS   | 399/80, 99           | 30 | 46 | 30 |
| Perfluoroheptadisulfonate            | PFHpS   | 449/80, 99           | 18 | 48 | 30 |
| Perfluorooctadisulfonate             | PFOS    | 499/80, 99           | 19 | 54 | 30 |
| Perfluorononadisulfonate             | PFNS    | 549/80, 99           | 20 | 50 | 30 |
| Perfluorodecadisulfonate             | PFDS    | 599/80, 99           | 20 | 55 | 30 |
| Perfluorododecadisulfonate           | PFDoDS  | 699/80, 99           | 20 | 55 | 30 |
| Ionic Labeled PFAAs                  |         |                      |    |    |    |
| <sup>13</sup> C <sub>4</sub> -PFBA   | MPFBA   | 217/172, 59          | 26 | 10 | 18 |
| <sup>13</sup> C <sub>2</sub> -PFHxA  | MPFHxA  | 315/270, 120         | 24 | 9  | 30 |
| <sup>13</sup> C <sub>4</sub> -PFOA   | MPFOA   | 417/372.1, 168.9     | 30 | 11 | 26 |
| <sup>13</sup> C <sub>5</sub> -PFNA   | MPFNA   | 468/423.1, 222.9     | 18 | 11 | 30 |
| <sup>13</sup> C <sub>2</sub> -PFDA   | MPFDA   | 515.1/470, 220.1     | 20 | 12 | 23 |
| <sup>13</sup> C <sub>2</sub> -PFUnDA | MPFUnDA | 565/520.1, 169.1     | 20 | 13 | 38 |
| <sup>13</sup> C <sub>2</sub> -PFDoDA | MPFDoDA | 615.1/570, 319       | 24 | 13 | 28 |
| <sup>18</sup> O <sub>2</sub> -PFHxS  | MPFHxS  | 403/84, 103          | 15 | 46 | 30 |
| <sup>13</sup> C <sub>4</sub> -PFOS   | MPFOS   | 503/80, 99           | 36 | 50 | 30 |

**Table S3.** Ranges and average of sumPFCA concentrations (ng·g<sup>-1</sup>·dw<sup>-1</sup>) in vegetable groups of vegetable items collected in LN.

| Groups | Leaf Vegetables   | Stem Vegetables  | Fruiting Vegetables | Brassica Vegetables | Root Vegetables  | Starchy Roots Tubers | Bean Vegetables   |
|--------|-------------------|------------------|---------------------|---------------------|------------------|----------------------|-------------------|
|        | 1 Chinese cabbage | 4 Celery         | 6 Tomato            | 16 Cabbage          | 17 Radish        | 19 Potato            | 22 Asparagus bean |
|        | 2 Lettuce         | 5 Celery         | 7 Tomato            |                     | 18 Radish        | 20 Potato            | 23 Kidney bean    |
|        | 3 Baby cabbage    |                  | 8 Tomato            |                     |                  | 21 Potato            | 24 Asparagus bean |
|        |                   |                  | 9 Tomato            |                     |                  |                      | 25 Asparagus bean |
|        |                   |                  | 10 Tomato           |                     |                  |                      |                   |
|        |                   |                  | 11 Cucumber         |                     |                  |                      |                   |
|        |                   |                  | 12 Cucumber         |                     |                  |                      |                   |
|        |                   |                  | 13 Cucumber         |                     |                  |                      |                   |
|        |                   |                  | 14 Cucumber         |                     |                  |                      |                   |
|        |                   |                  | 15 Cucumber         |                     |                  |                      |                   |
| Conc.  | 0.05–0.16 (0.09)  | 1.09–8.55 (4.82) | <MQL-2.46 (0.28)    | 0.005               | <MQL-0.12 (0.06) | <MQL-0.32 (0.15)     | 0.30–6.76 (2.80)  |

LV: leaf vegetable, SV stem vegetable, FV fruiting vegetable, BV brassica vegetable, RV root vegetables, SR starchy roots tubers, Be Beans, <MQL less than method quantification limit.

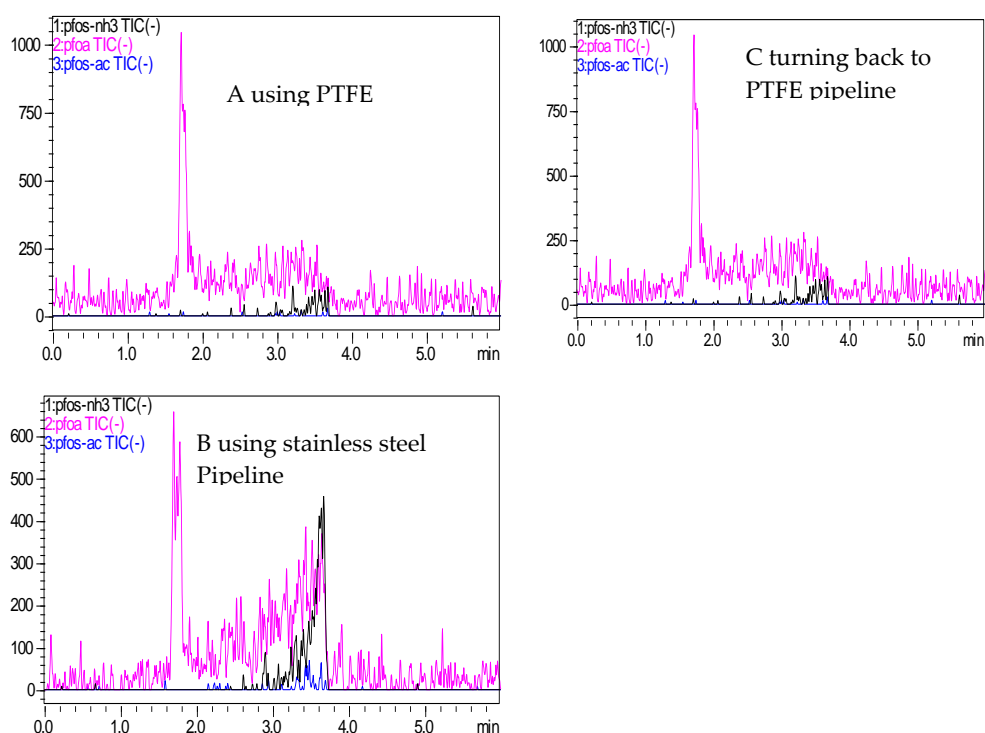

Figure S1. Background pollution of PFOA from PTFE pipelines.

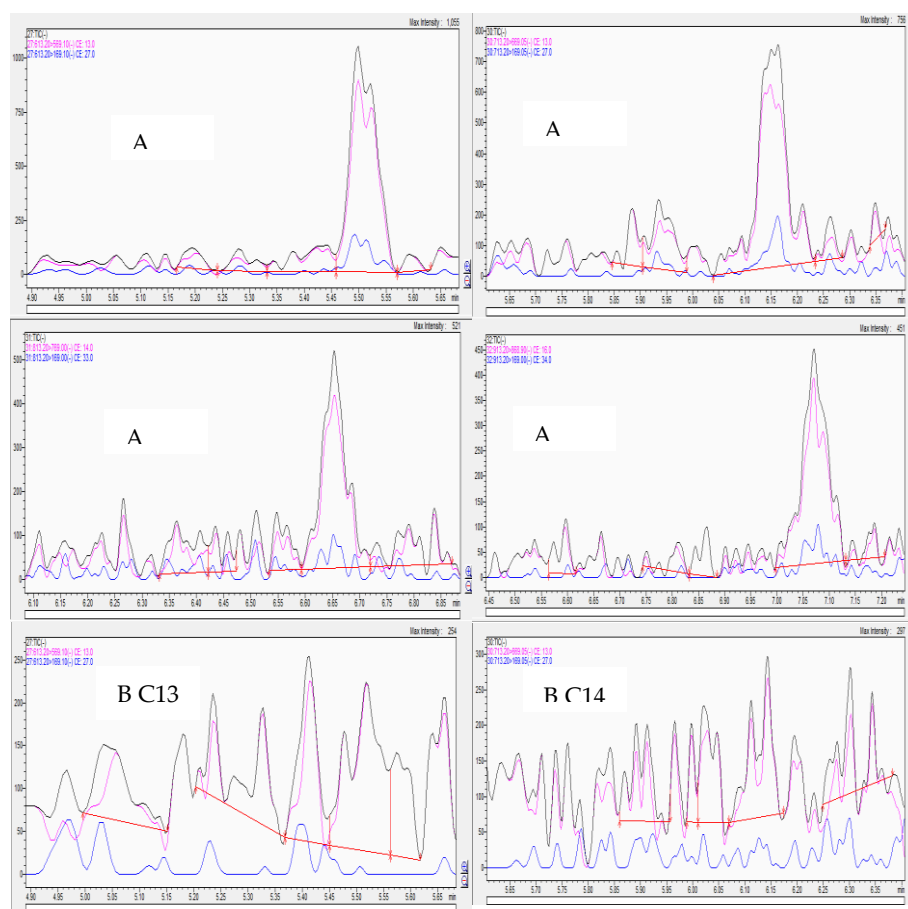

Figure S2. The background pollution of long chain PFAAs. A represents the chromatograms before removing the pollution and B represents the chromatograms after removing the background pollution.

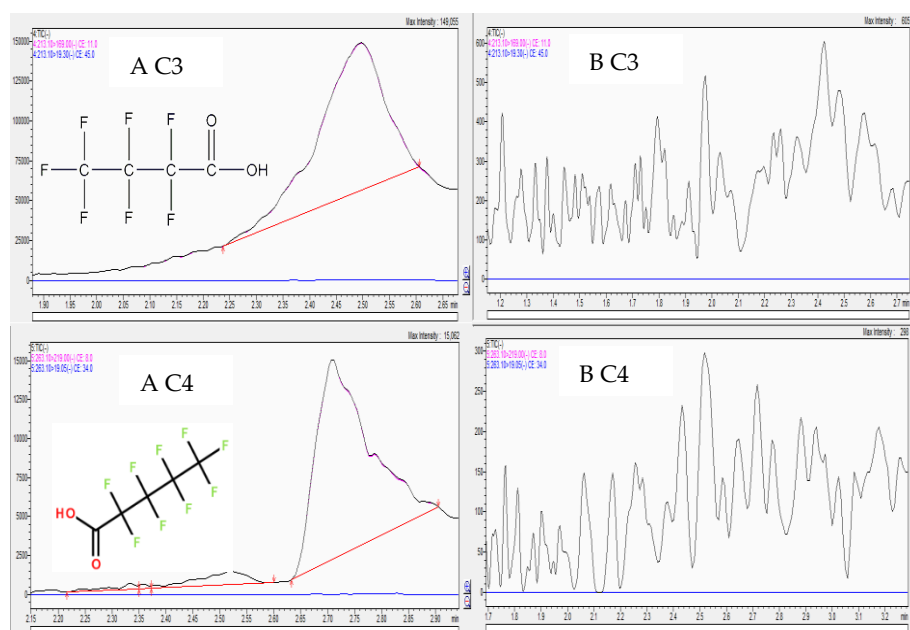

**Figure S3.** The background pollution of short chain PFAAs (C<sub>3</sub> and C<sub>4</sub>). A represents the chromatograms before removing the pollution and B represents the chromatograms after removing the background pollution.

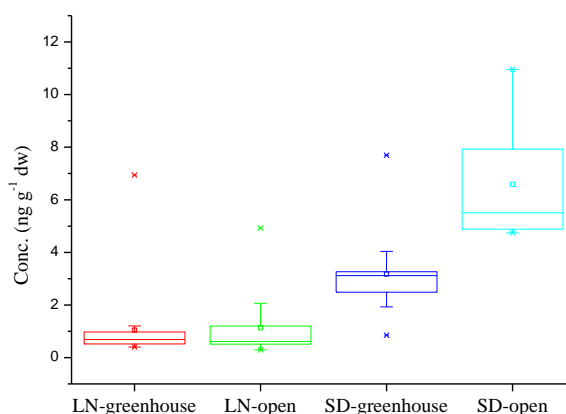

**Figure S4.** The box plot of concentrations of PFAAs from greenhouse and open agriculture in LN and SD province. “□” represents 25%–75%, “\*” represents outlier, “ I ” represents Min–Max.

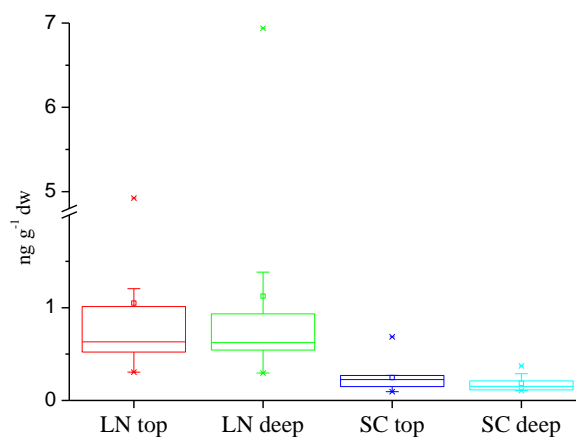

**Figure S5.** The box plot for the concentration of PFCs from top and deep layer from LN (Liaoning) and SC (Sichuan) provinces. “□” represents 25%–75%, “\*” represents outlier, “ I ” represents Min–Max.

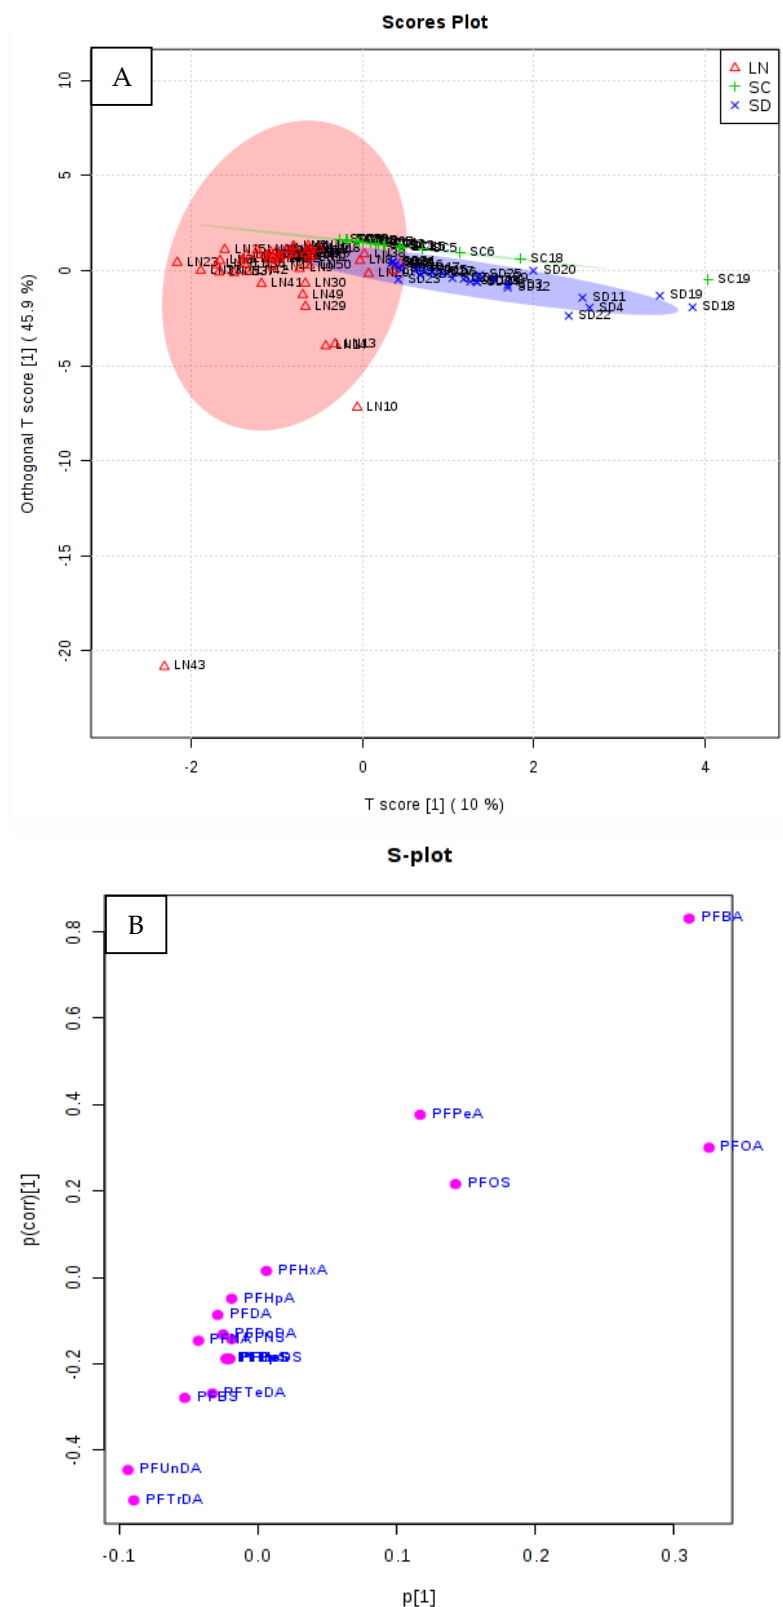

**Figure S6.** Principle component analysis (PCA) and orthogonal partial least squares-discriminate analysis (OPLS-DA) analysis for PFAA homologues in soil samples from the provinces of LN, SC and SD (PCA analysis could provide the max different compound between the three provinces, so the compound could be considered as the marker of differentiating source of PFAAs). (A) represents score plot and (B) represents loading plot.

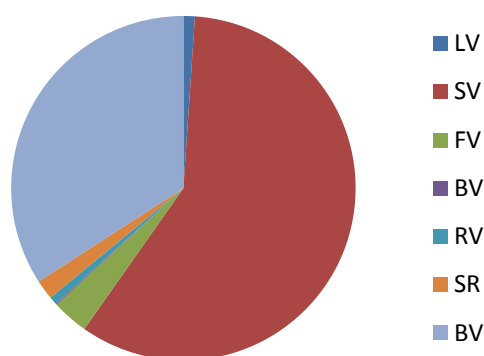

**Figure S7.** The relative PFAA distribution in vegetables sub-groups. LV leaf vegetables, SV stem vegetables, FV fruiting vegetables, BV *Brassica* vegetables, RV root vegetables, SR starchy root tubers, BV bean vegetables.

**Correlations**

|                |       |                         | prod  | water | soil  |
|----------------|-------|-------------------------|-------|-------|-------|
| Spearman's rho | prod  | Correlation Coefficient | 1.000 | .480* | .108  |
|                |       | Sig. (2-tailed)         | .     | .015  | .608  |
|                |       | N                       | 25    | 25    | 25    |
|                | water | Correlation Coefficient | .480* | 1.000 | .136  |
|                |       | Sig. (2-tailed)         | .015  | .     | .517  |
|                |       | N                       | 25    | 25    | 25    |
|                | soil  | Correlation Coefficient | .108  | .136  | 1.000 |
|                |       | Sig. (2-tailed)         | .608  | .517  | .     |
|                |       | N                       | 25    | 25    | 25    |

\*. Correlation is significant at the 0.05 level (2-tailed).

**Correlations**

|                |       |                         | prod  | water | soil  |
|----------------|-------|-------------------------|-------|-------|-------|
| Spearman's rho | prod  | Correlation Coefficient | 1.000 | -.057 | .153  |
|                |       | Sig. (2-tailed)         | .     | .787  | .466  |
|                |       | N                       | 25    | 25    | 25    |
|                | water | Correlation Coefficient | -.057 | 1.000 | .140  |
|                |       | Sig. (2-tailed)         | .787  | .     | .504  |
|                |       | N                       | 25    | 25    | 25    |
|                | soil  | Correlation Coefficient | .153  | .140  | 1.000 |
|                |       | Sig. (2-tailed)         | .466  | .504  | .     |
|                |       | N                       | 25    | 25    | 25    |

**Figure S8.** The correlation analysis of concentration between soil, irrigation water (water) and agricultural products (prod) by SPSS Spearman correlation for PFOA (top) and PFAAs (bottom).

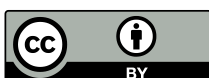

© 2016 by the authors; licensee MDPI, Basel, Switzerland. This article is an open access article distributed under the terms and conditions of the Creative Commons by Attribution (CC-BY) license (<http://creativecommons.org/licenses/by/4.0/>).
